# Supplementary material for: Fidelity, tolerability and safety of acute high-intensity interval training after hospitalisation for COVID-19: a randomised cross-over trial
Source: HighWire-hosted journal article supplement (doi:10.1136/bmjsem-2021-001156), 2021-09-01
Supplement: bmjsem-2021-001156supp001_data_supplement.pdf [file bmjsem-2021-001156supp001_data_supplement.pdf]

**Fidelity, tolerability, and safety of high intensity training after hospitalisation for COVID-19****Online Supplemental Figures**

Frederik Foged, Iben Elmerdahl Rasmussen, Josephine Bjørn Budde, Rasmus Syberg Rasmussen, Villads Rasmussen, Mark Lyngbæk, Simon Jønck, Rikke Krogh-Madsen, Birgitte Lindegaard, Mathias Ried-Larsen, Ronan M. G. Berg, Regitse Højgaard Christensen

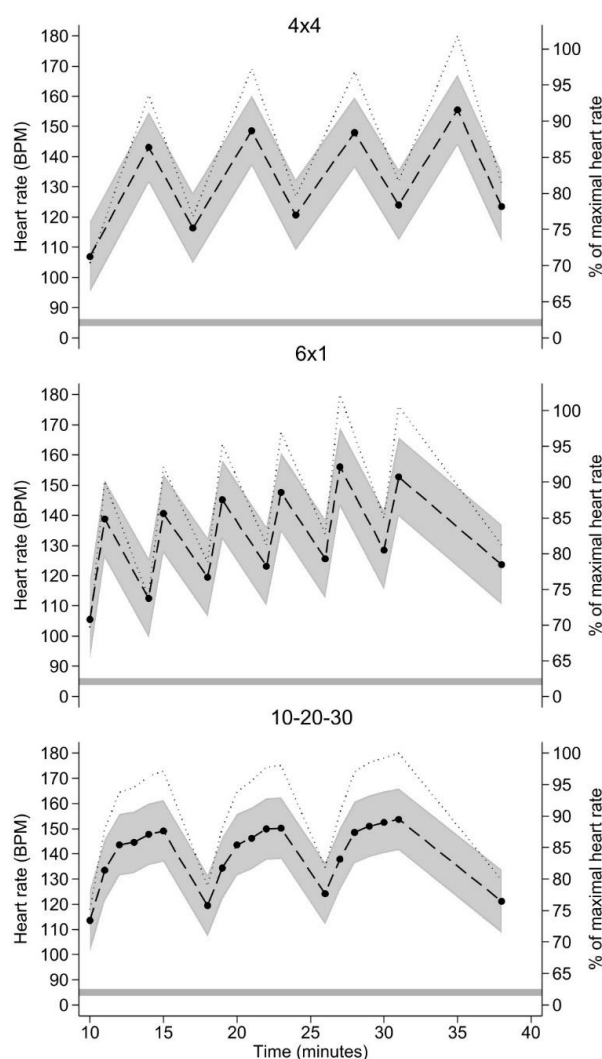

**Online Supplemental Figure 1.** Graphic overview of the heart rate response to each protocol. Each dot is the HR (least squares means) at the end of each interval/rest period. The dashed line is absolute heart rate with the shadow being 95% CI and the dotted line is % of  $HR_{max}$ .

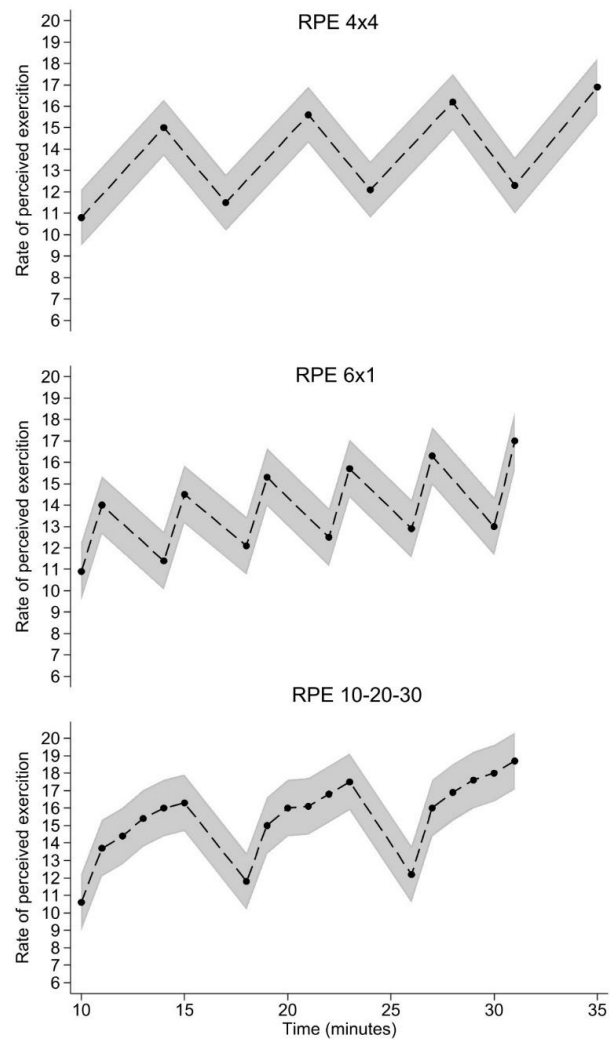

**Online Supplemental Figure 2.** Graphic overview of the rate of perceived exertion (RPE=) of each protocol. Each dot (least squares means) is the RPE at the end of each interval/rest period.
